# Supplementary material for: RETRACTED: Isolation and Identification of Fungi from Egyptian Ras Cheese Made with some Probiotic Lactobacillus spp. with Reference to Their Toxins and Enzymes
Source: Research Square preprint supplement (doi:10.21203/rs.3.rs-1453816/v1), 2022-03-28
Supplement: Supplementary file 1 [file b74a58094f861f09fed83d71.docx]

**Appendix**

***Aspergillus flavus***


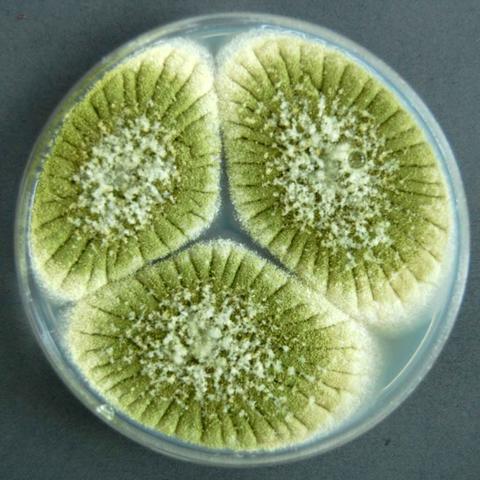

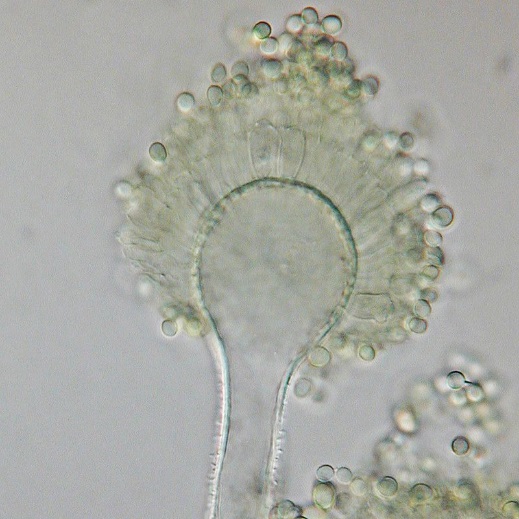


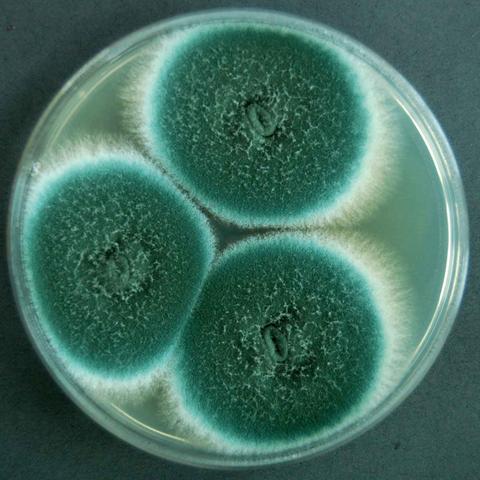

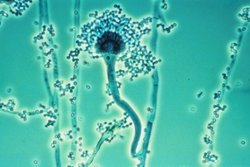
***Aspergillus fumigatus***


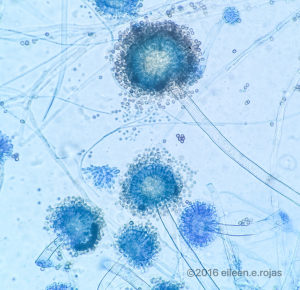
***Aspergillus niger***


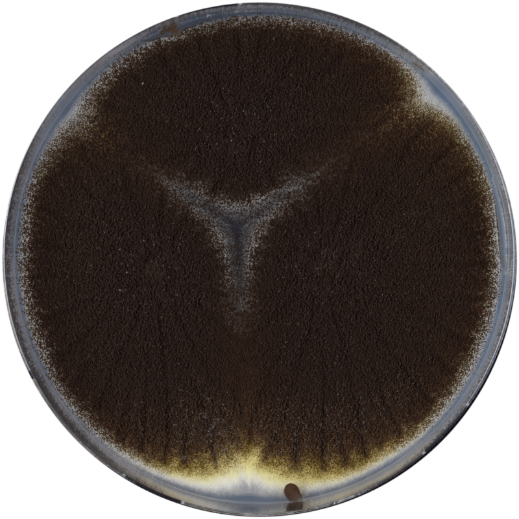


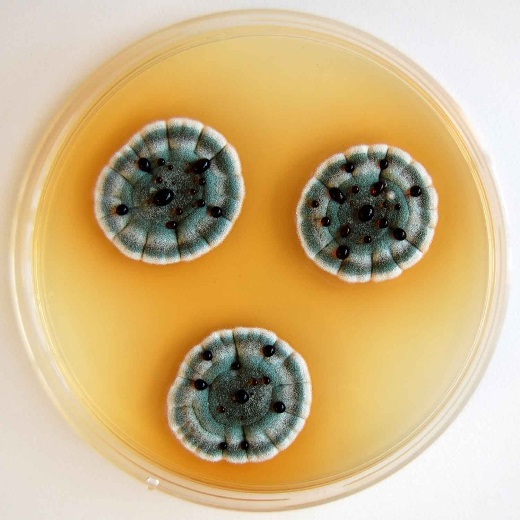

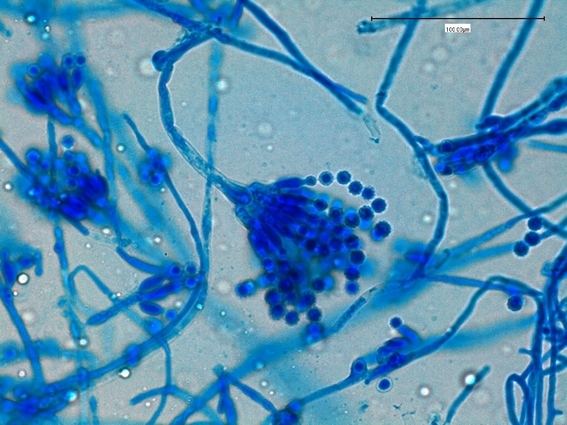
***Aspergillus sydowii***

***Aspergillus terreus***


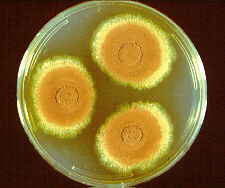

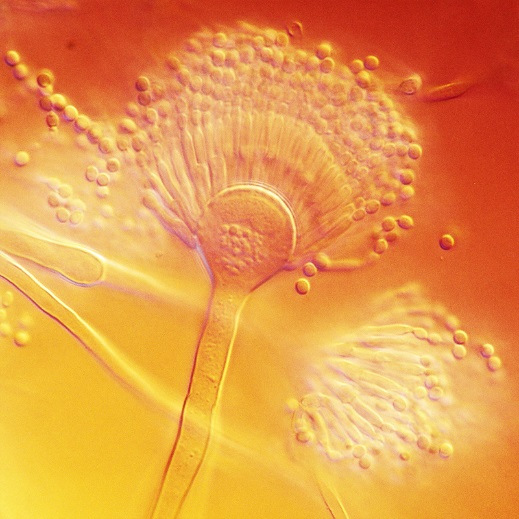


***Aspergillus ustus***


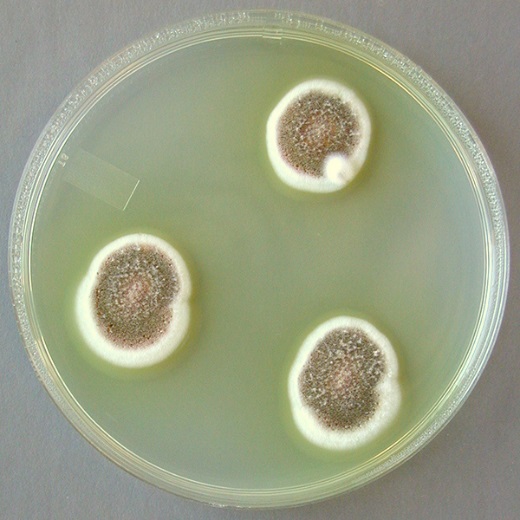

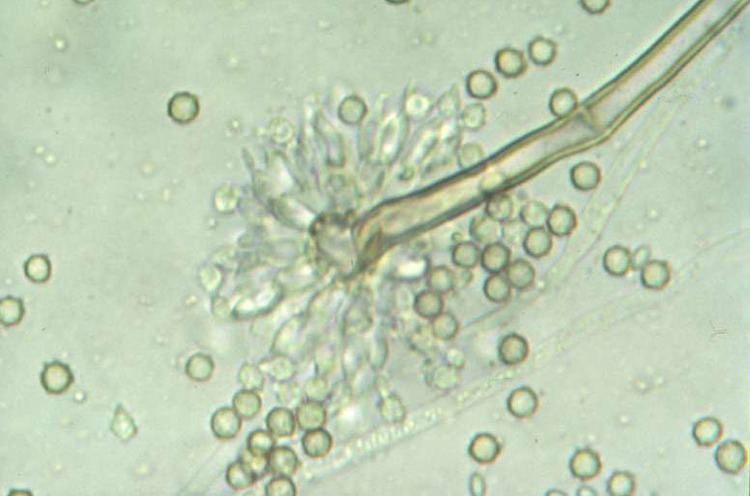


***Aspergillus versicolor***


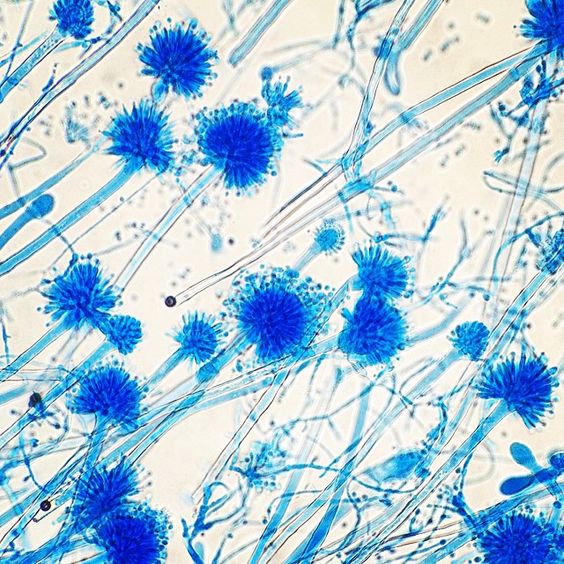


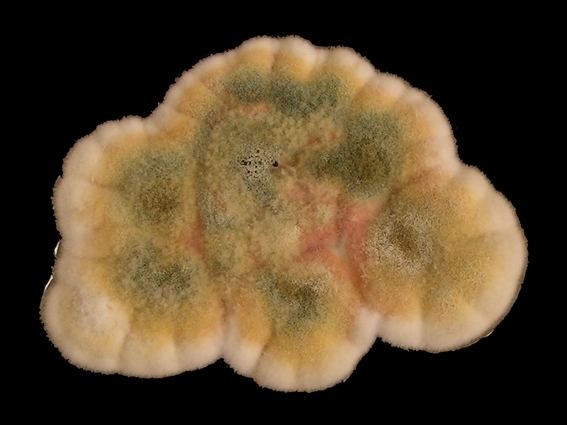


***Cladosporium cladosporioides***
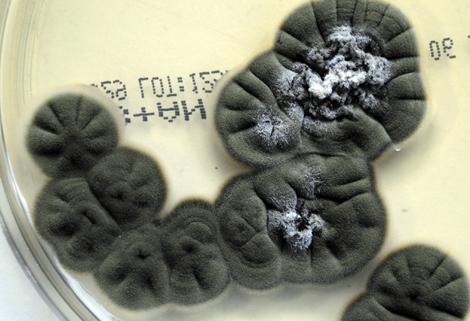

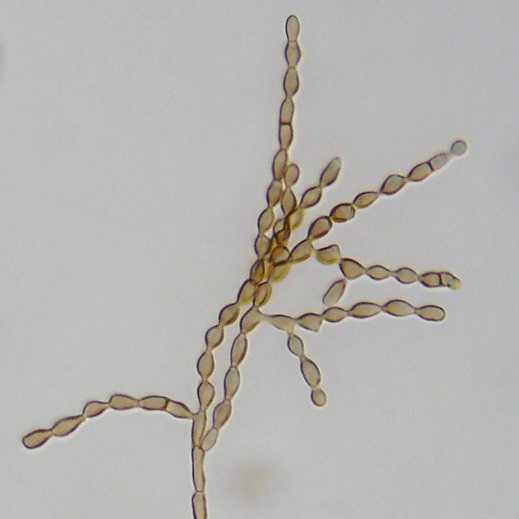


***Mucor hiemalis***


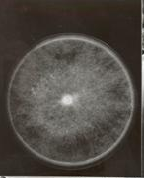
***
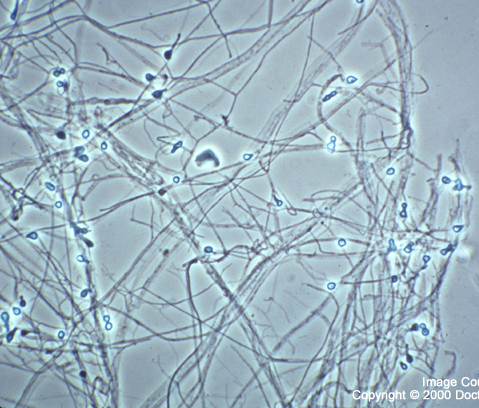
***


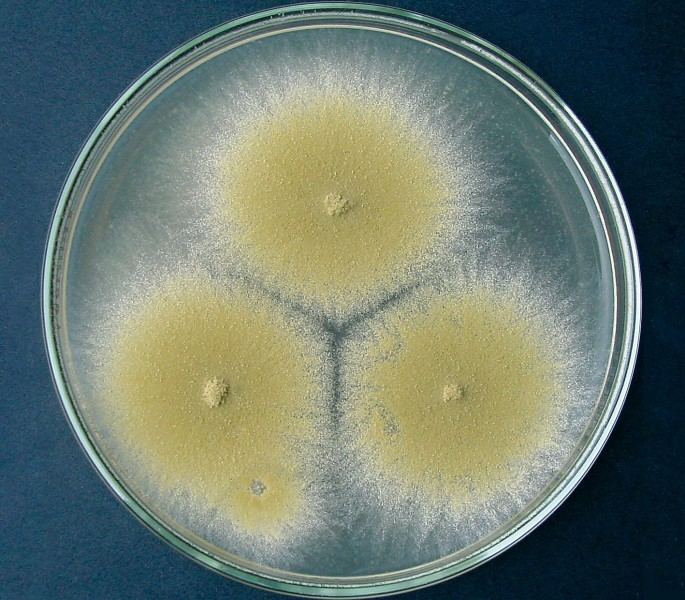
***Paecilomyces variotii***


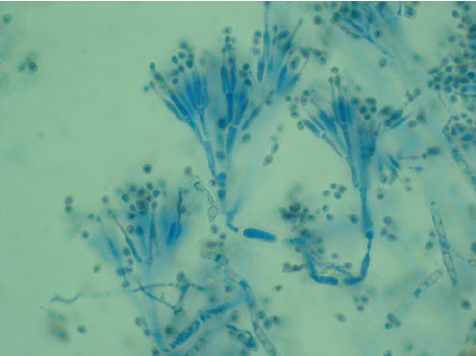


***Penicillium chrysogenum***


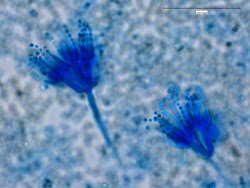

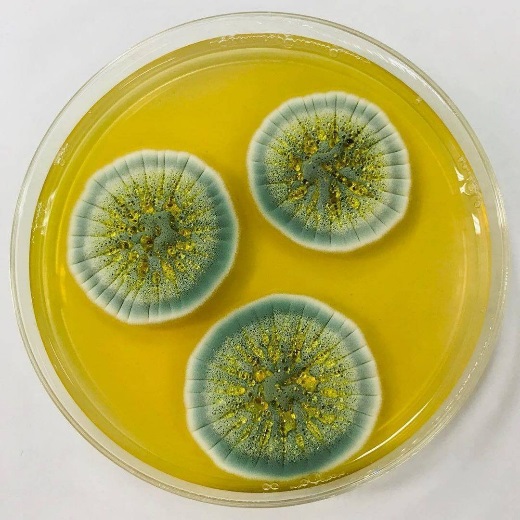


***Penicillium corylophilum***


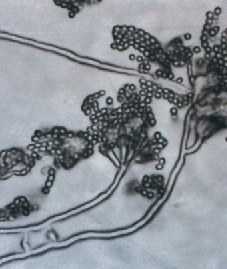

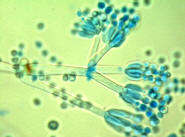


***Penicillium funiculosum***

***
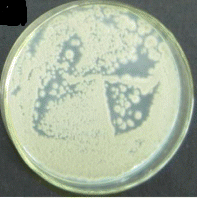
***
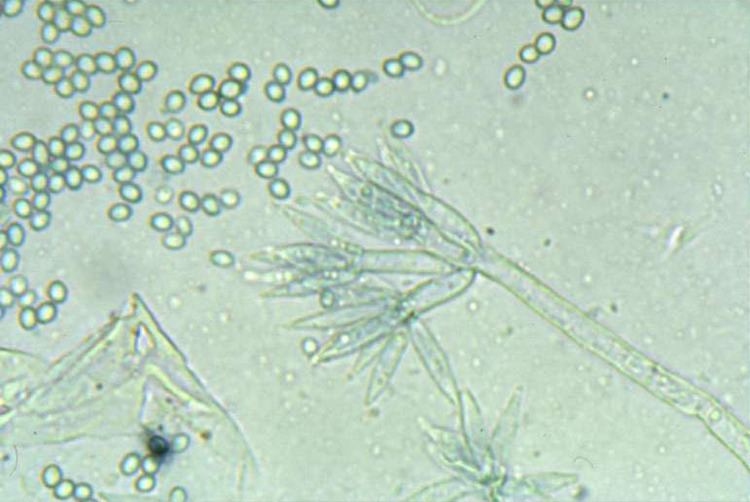


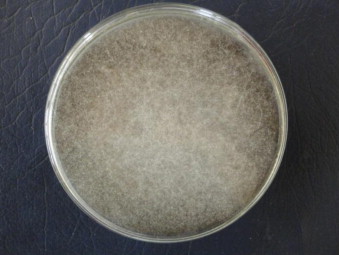

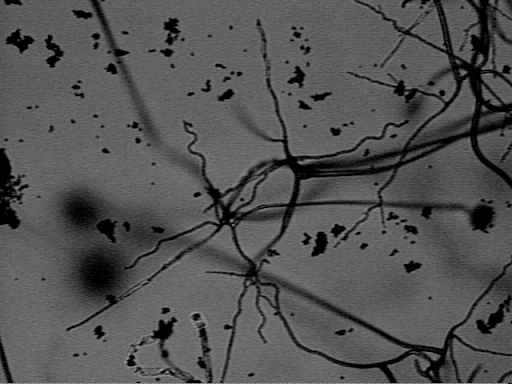
***Rhizopus stolonifer***
